# Supplementary material for: Facile synthesis of polymer/Au heteronanoparticles
Source: Royal Society of Chemistry journal article supplement (doi:10.1039/c1cc10610d), 2011-01-01
Supplement: c1cc10610d.pdf [file c1cc10610d.pdf]

## Supporting Information

### Facile Synthesis of Polymer/Au Heteronanoparticles

Jiayuan Mao, Xiuxiu Qi, Xueqin Cao, Jianmei Lu,\* Qingfeng Xu,\* Hongwei Gu\*

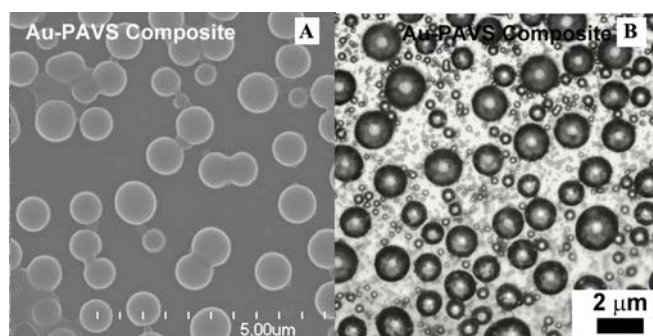

Figure S1, SEM and Optical images of Au-PAVS composite

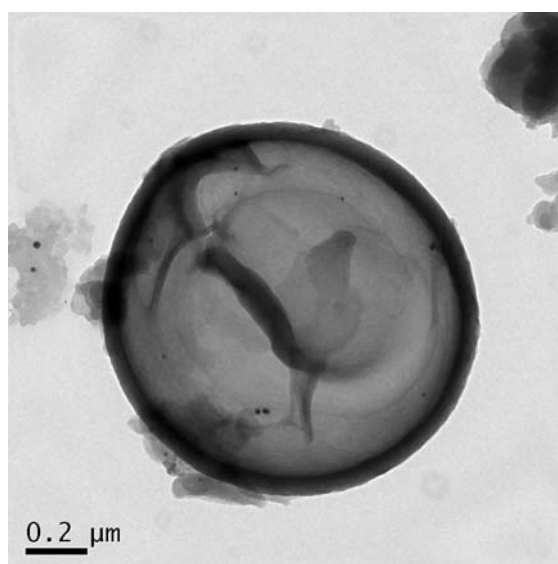

Figure S2, TEM image of PAVS sphere

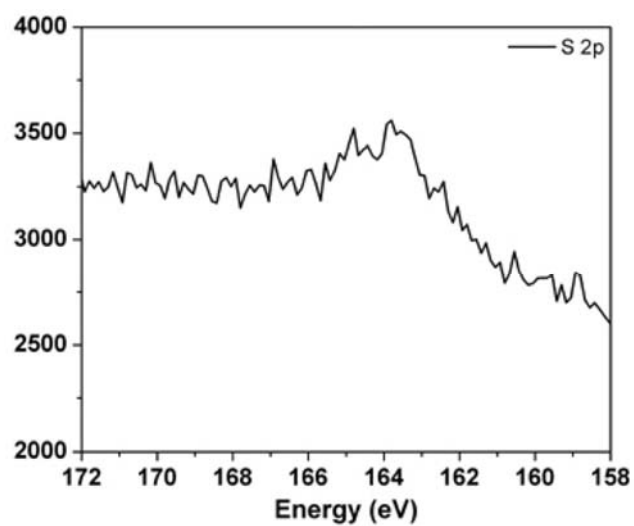

Figure S3, XPS spectrum of PAVS sphere

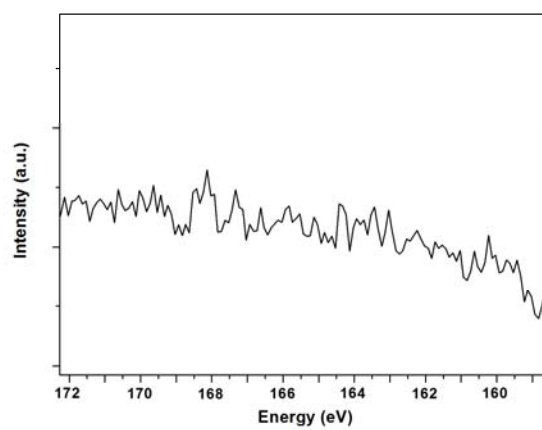

Figure S4, XPS spectrum of PS sphere
